# Supplementary material for: Phase I-IIa clinical trial to evaluate the safety, feasibility and efficacy of the use of a palate mucosa generated by tissue engineering for the treatment of children with cleft palate: the BIOCLEFT study protocol
Source: PubMed Central journal article supplement (PMC11624797; doi:10.1136/bmjopen-2024-093491), 2024-12-05
Supplement: bmjopen-14-12-s002.pdf [file bmjopen-14-12-s002.pdf]

**Supplementary Table S2.** Questionnaire used to assess the patient’s aesthetic appearance.

| <b>PATIENT AESTHETIC EVALUATION. Each question must be rated using a Likert-like scale ranging from 0 to 4</b> | <b>NO IMPROVEMENT (0)</b> | <b>25% IMPROVEMENT (1)</b> | <b>50% IMPROVEMENT (2)</b> | <b>75% IMPROVEMENT (3)</b> | <b>100% IMPROVEMENT (4)</b> |
|----------------------------------------------------------------------------------------------------------------|---------------------------|----------------------------|----------------------------|----------------------------|-----------------------------|
| <b>1. LIP EVALUATION</b>                                                                                       |                           |                            |                            |                            |                             |
| 1.1. Lip symmetry                                                                                              |                           |                            |                            |                            |                             |
| 1.2. Shape of the philtrum                                                                                     |                           |                            |                            |                            |                             |
| 1.3. Visibility of the scar                                                                                    |                           |                            |                            |                            |                             |
| 1.4. Symmetry of the dry/wet line                                                                              |                           |                            |                            |                            |                             |
| 1.5. Lip fullness                                                                                              |                           |                            |                            |                            |                             |
| <b>2. NOSE EVALUATION</b>                                                                                      |                           |                            |                            |                            |                             |
| 2.1. Symmetry of the nose tip                                                                                  |                           |                            |                            |                            |                             |
| 2.2. Symmetry of the nostrils                                                                                  |                           |                            |                            |                            |                             |
