# Supplementary material for: Phase I-IIa clinical trial to evaluate the safety, feasibility and efficacy of the use of a palate mucosa generated by tissue engineering for the treatment of children with cleft palate: the BIOCLEFT study protocol
Source: HighWire-hosted journal article supplement (doi:10.1136/bmjopen-2024-093491), 2024-12-01
Supplement: bmjopen-2024-093491supp001_data_supplement.pdf [file bmjopen-2024-093491supp001_data_supplement.pdf]

Supplementary Table S1. Questionnaire used to assess feasibility of the procedure.

| SURGEON SATISFACTION QUESTIONNAIRE. Each question must be rated using a Likert-like scale ranging from 1 to 5                                                                                            | VERY BAD<br>(1) | BAD<br>(2) | AVERAGE<br>(3) | GOOD<br>(4) | EXCELLENT<br>(5) |
|----------------------------------------------------------------------------------------------------------------------------------------------------------------------------------------------------------|-----------------|------------|----------------|-------------|------------------|
| 1. GENERAL APPEARANCE AND ASPECT OF THE BIOCLEFT AUTOLOGOUS PALATE MUCOSA GENERATED BY TISSUE ENGINEERING USING NANOSTRUCTURED FIBRIN-AGAROSE BIOMATERIALS GRAFTED IN CHILDREN WITH CLEFT LIP AND PALATE |                 |            |                |             |                  |
| 1.1. The product has an adequate aspect, is homogeneous and is devoid of any apparent defects?                                                                                                           |                 |            |                |             |                  |
| 1.2. The size of the product is adequate for use in patients affected by cleft lip and palate?                                                                                                           |                 |            |                |             |                  |
| 1.3. The color of the product is compatible with a normal tissue?                                                                                                                                        |                 |            |                |             |                  |
| 1.4. Is it easy to identify both tissue layers of the product (epithelium and connective tissue)?                                                                                                        |                 |            |                |             |                  |
| 2. HANDLING THE BIOCLEFT PRODUCT                                                                                                                                                                         |                 |            |                |             |                  |
| 2.1. Can this product be easily extracted from the recipient in which the tissue substitute has been delivered to the operating room?                                                                    |                 |            |                |             |                  |
| 2.2. Can this product be easily handled using surgical forceps?                                                                                                                                          |                 |            |                |             |                  |
| 2.3. Can this product be easily trimmed and adapted to the surgical site using a scalpel or other surgical instrument?                                                                                   |                 |            |                |             |                  |
| 2.4. Can this product be easily placed at the palate defect area?                                                                                                                                        |                 |            |                |             |                  |
| 2.5. Can this product be easily sutured at the palate defect area?                                                                                                                                       |                 |            |                |             |                  |
| 2.6. Has this product the capability to adhere to the palate defect area?                                                                                                                                |                 |            |                |             |                  |
| 3. RESULTS OF THE IMPLANT                                                                                                                                                                                |                 |            |                |             |                  |
| 3.1. Has this product efficiently covered the palate defect area?                                                                                                                                        |                 |            |                |             |                  |
| 3.2. Once grafted, is the aspect of the implant adequate?                                                                                                                                                |                 |            |                |             |                  |
| 3.3. Once grafted, has the implant a homogeneous aspect, without bubbles and without any detectable defects?                                                                                             |                 |            |                |             |                  |
| 3.4. Overall, do you think the implant of the product has been feasible?                                                                                                                                 |                 |            |                |             |                  |
| 3.5. In general, do you think the implant of the BIOCLEFT product has been easy?                                                                                                                         |                 |            |                |             |                  |
