# Supplementary material for: Phase I-IIa clinical trial to evaluate the safety, feasibility and efficacy of the use of a palate mucosa generated by tissue engineering for the treatment of children with cleft palate: the BIOCLEFT study protocol
Source: HighWire-hosted journal article supplement (doi:10.1136/bmjopen-2024-093491), 2024-12-01
Supplement: bmjopen-2024-093491supp002_data_supplement.pdf [file bmjopen-2024-093491supp002_data_supplement.pdf]

**Supplementary Table S2.** Questionnaire used to assess the patient’s aesthetic appearance.

| PATIENT AESTHETIC EVALUATION. Each question must be rated using a Likert-like scale ranging from 0 to 4 | NO IMPROVEMENT (0) | 25% IMPROVEMENT (1) | 50% IMPROVEMENT (2) | 75% IMPROVEMENT (3) | 100% IMPROVEMENT (4) |
|---------------------------------------------------------------------------------------------------------|--------------------|---------------------|---------------------|---------------------|----------------------|
| 1. LIP EVALUATION                                                                                       |                    |                     |                     |                     |                      |
| 1.1. Lip symmetry                                                                                       |                    |                     |                     |                     |                      |
| 1.2. Shape of the philtrum                                                                              |                    |                     |                     |                     |                      |
| 1.3. Visibility of the scar                                                                             |                    |                     |                     |                     |                      |
| 1.4. Symmetry of the dry/wet line                                                                       |                    |                     |                     |                     |                      |
| 1.5. Lip fullness                                                                                       |                    |                     |                     |                     |                      |
| 2. NOSE EVALUATION                                                                                      |                    |                     |                     |                     |                      |
| 2.1. Symmetry of the nose tip                                                                           |                    |                     |                     |                     |                      |
| 2.2. Symmetry of the nostrils                                                                           |                    |                     |                     |                     |                      |
